# Supplementary material
Source: publisher site journal article supplement (https://www.dovepress.com/article/285542)
Supplement: Supplementary file 1 [file get_supplementary_file.php]

## Supplementary Material

### Questioners

| S. No     | List of variables                          | Response                                            | Remark |
|-----------|--------------------------------------------|-----------------------------------------------------|--------|
| <b>I</b>  | <b>Socio-demographic X. ctics</b>          |                                                     |        |
| 001       | Patient registration No.                   |                                                     |        |
| 002       | Age                                        | _____                                               |        |
| 003       | Sex                                        | 1. Male<br>2. Female                                |        |
| 004       | Address                                    | 1. Urban<br>2. Rural                                |        |
| 005       | Year of treatment                          | 1. 2015<br>2. 2016<br>3. 2017<br>4. 2018<br>5. 2019 |        |
| 006       | Weight                                     | _____                                               |        |
| <b>II</b> | <b>Clinical characteristics</b>            |                                                     |        |
| 101       | Type of TB :                               | 1. Pulmonary TB<br>2. Extra pulmonary TB            |        |
| 102       | Smear result                               | 1. Smear +ve<br>2. Smear -ve<br>3. Unknown          |        |
| 103       | HIV status :                               | 1. HIV +ve<br>2. HIV -ve<br>3. Unknown              |        |
| 104       | Cotrimoxazole preventive therapy initiated | 1. yes<br>2. NO<br>3. Unknown                       |        |
| 105       | Smear result after 2 month                 | 1. Smear +ve<br>2. Smear -ve<br>3. Unknown          |        |
| 106       | Anti-TB Drug on Intensive                  | 1. RHZE                                             |        |

|     |                                    |                                                                                                                                                                                                                                                           |  |
|-----|------------------------------------|-----------------------------------------------------------------------------------------------------------------------------------------------------------------------------------------------------------------------------------------------------------|--|
|     | phase                              | <ol style="list-style-type: none"> <li>2. RHZES</li> <li>3. Other</li> </ol>                                                                                                                                                                              |  |
| 107 | Anti-TB Drug on continuation phase | <ol style="list-style-type: none"> <li>1. RH</li> <li>2. EH</li> <li>3. Other</li> </ol>                                                                                                                                                                  |  |
| 108 | Treatment outcome                  | <ol style="list-style-type: none"> <li>1. Cure</li> <li>2. Completed</li> <li>3. Died,</li> <li>4. Failure,</li> <li>5. Defaulted,</li> <li>6. trans out,</li> <li>7. moved to MDR-TB,</li> <li>8. not evaluated</li> <li>9. lost to follow up</li> </ol> |  |
| 109 | Treatment success rate             | <ol style="list-style-type: none"> <li>1. successful(cured &amp;completed)</li> <li>2. unsuccessful</li> <li>3. unknown</li> </ol>                                                                                                                        |  |
